# Supplementary material for: Tuning the dipolar second-order nonlinear optical properties of 5-π-delocalized-donor-1,3-di(2-pyridyl)benzenes, related cyclometallated platinum(ii) complexes and methylated salts
Source: Royal Society of Chemistry journal article supplement (doi:10.1039/c6dt04359c), 2016-12-23
Supplement: c6dt04359c1.pdf [file c6dt04359c1.pdf]

## Electronic Supplementary Information

### **Tuning the dipolar second-order nonlinear optical properties of 5- $\pi$ -delocalized-donor-1,3-di(2-pyridyl)benzenes, related cyclometallated platinum(II) complexes and methylated salts**

Filippo Nisic<sup>a</sup>, Elena Cariatì<sup>a,b</sup>, Alessia Colombo<sup>a</sup>, Claudia Dragonetti<sup>a,b</sup>, Simona Fantacci<sup>c\*</sup>, Eleonora Garoni<sup>a</sup>, Elena Lucenti<sup>b</sup>, Stefania Righetto<sup>a</sup>, Dominique Roberto<sup>a,b\*</sup> and J. A. Gareth Williams<sup>d</sup>

- a. Dipartimento di Chimica dell'Università degli Studi di Milano, UDR-INSTM, via Golgi 19, I-20133, Milano, Italy.
- b. ISTM-CNR, via Golgi 19, I-20133, Milano, Italy.
- c. Computational Laboratory for Hybrid/Organic Photovoltaics (CLHYO), CNR-ISTM, Via Elce di Sotto 8, I-06213, Perugia, Italy.
- d. Department of Chemistry, University of Durham, South Road, Durham, DH1 3LE, United Kingdom.

## Optimized computed molecular structures

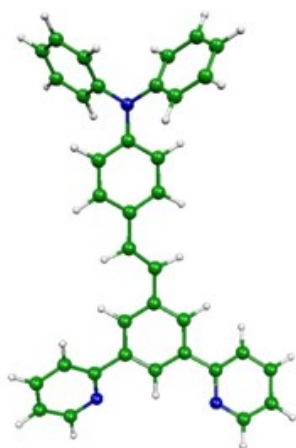

**1**

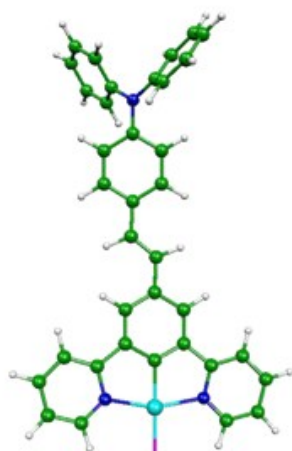

**1Pt**

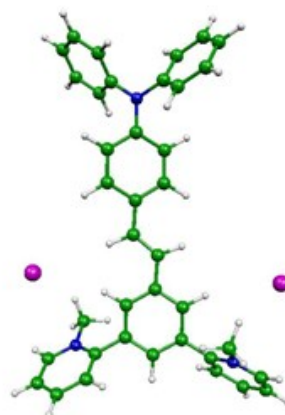

**1S**

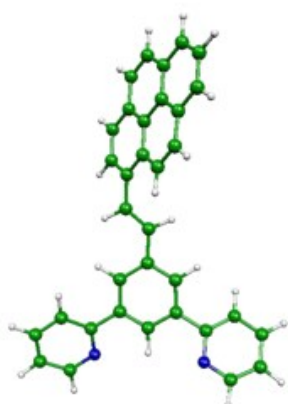

**2**

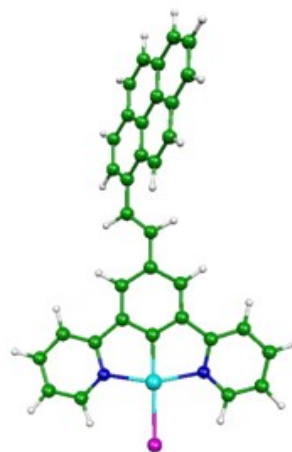

**2Pt**

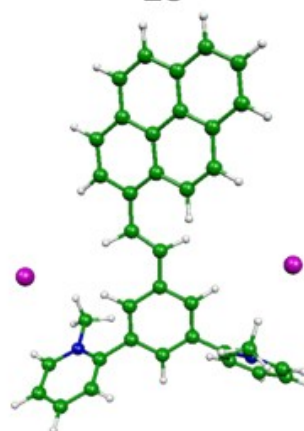

**2S**

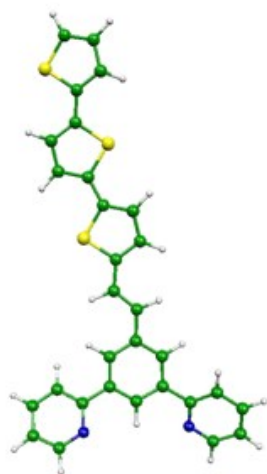

**3**

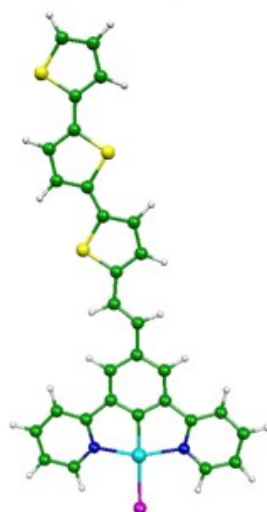

**3Pt**

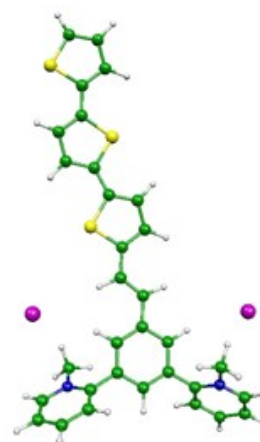

**3S**
